# Supplementary material for: Cell contractility arising from topography and shear flow determines human mesenchymal stem cell fate
Source: PubMed Central journal article supplement (PMC4754642; doi:10.1038/srep20415), 2016-02-16
Supplement: srep20415-s1.pdf [file srep20415-s1.pdf]

# **Cell contractility arising from topography and shear flow determines human mesenchymal stem cell fate**

Surabhi Sonam<sup>1, 2</sup>, Sharvari R. Sathe<sup>1</sup>, Evelyn K.F. Yim<sup>1, 2, 3</sup>, Michael P. Sheetz<sup>1, 4</sup>, Chwee Teck Lim<sup>\*1, 2, 5</sup>

<sup>1</sup>Mechanobiology Institute, National University of Singapore, 117411, Singapore

<sup>2</sup>Department of Biomedical Engineering, National University of Singapore, 117583, Singapore

<sup>3</sup>Department of Surgery, National University of Singapore, 119228, Singapore

<sup>4</sup>Department of Biological Sciences, Columbia University, New York, 10027, USA

<sup>5</sup>Department of Mechanical Engineering, National University of Singapore, 117575, Singapore

\*[ctlim@nus.edu.sg](mailto:ctlim@nus.edu.sg)

# Supplementary Figures

## Supplementary figure S1. Substrate topographies

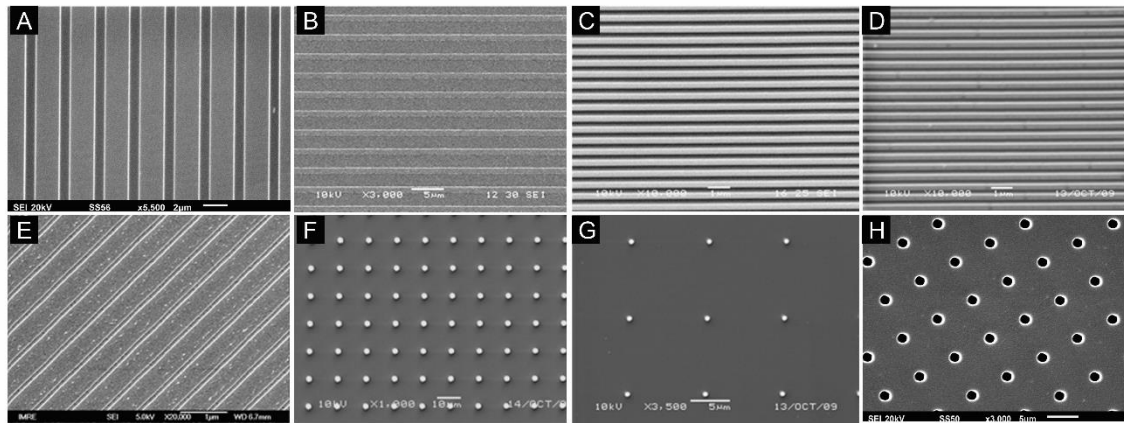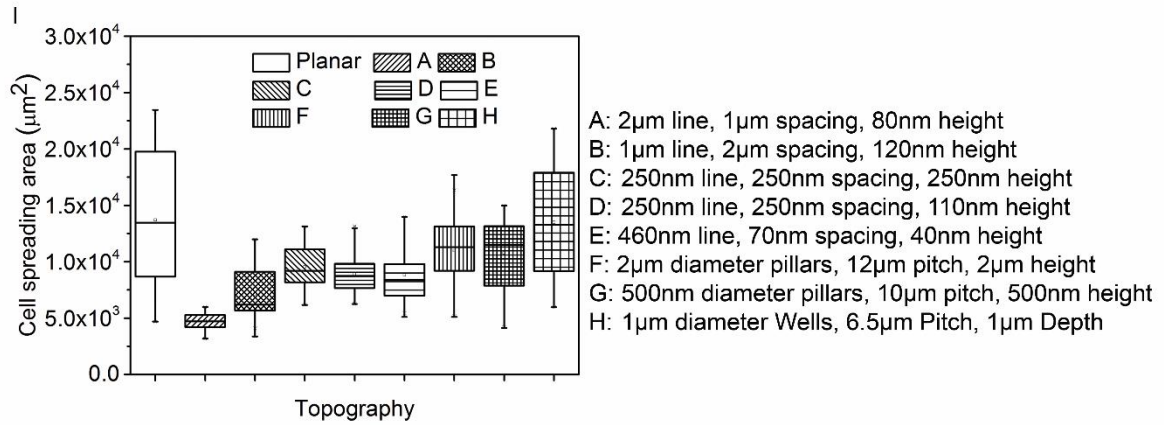

**Supplementary figure S1** | Scanning electron micrographs of A) 2µm line, 1µm spacing, 80nm height, Scale: 2µm, B) 1µm line, 2µm spacing, 120nm height, Scale: 5µm, C) 250nm line, 250nm spacing, 250nm height, Scale: 1µm, D) 250nm line, 250nm spacing, 110nm height, Scale: 1µm, E) 460nm line, 70nm spacing, 40nm height, Scale: 1µm, F) 2µm diameter pillars, 12µm pitch, 2µm height, Scale: 10µm, G) 500nm diameter pillars, 10µm pitch, 500nm height, Scale: 5µm, H) 1µm diameter Wells, 6.5µm Pitch, 1µm Depth, Scale: 5µm, I) Box plot of spreading area of cells on each of the topographies

## Supplementary figure S2. Topographical microfluidic channel

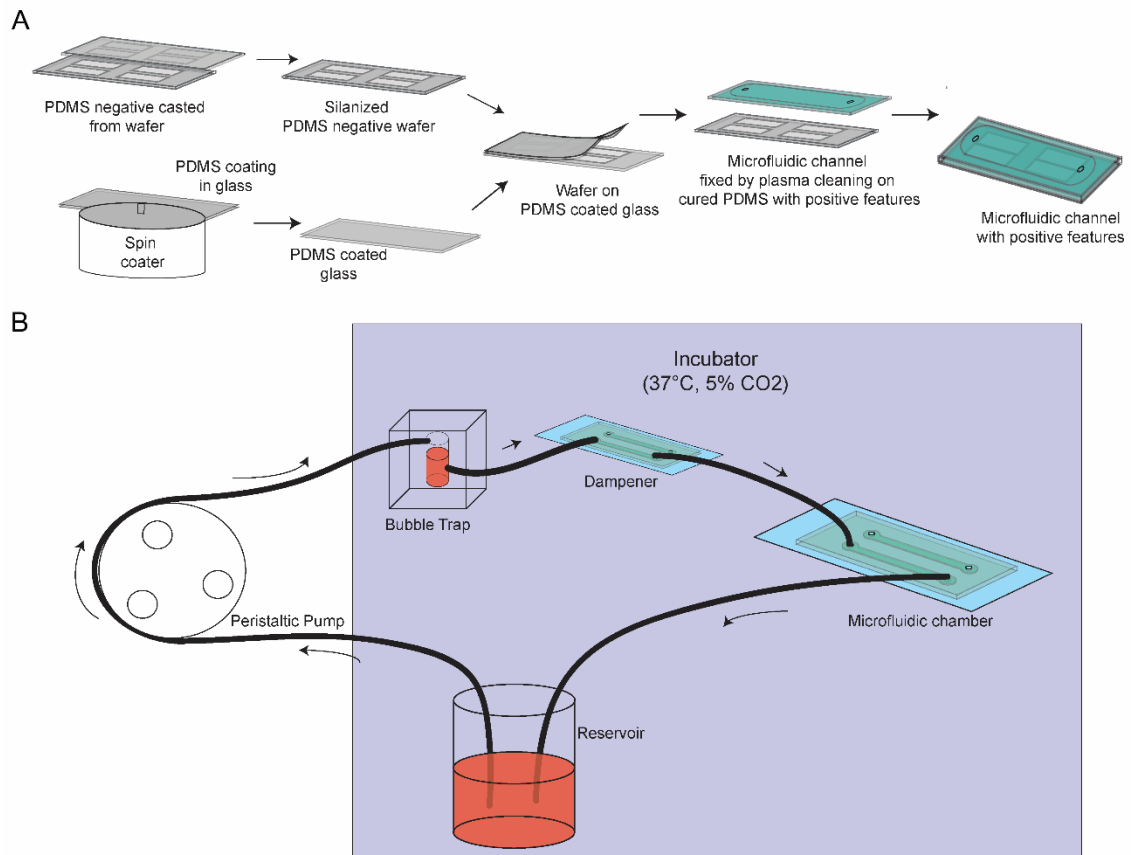

**Supplementary figure S2** | A. Illustration of process of fabrication of microfluidic channel with topographies. B. Illustration of fluid flow setup.

**Supplementary figure S3. Calibration of fluid flow regime formed on different topographies**

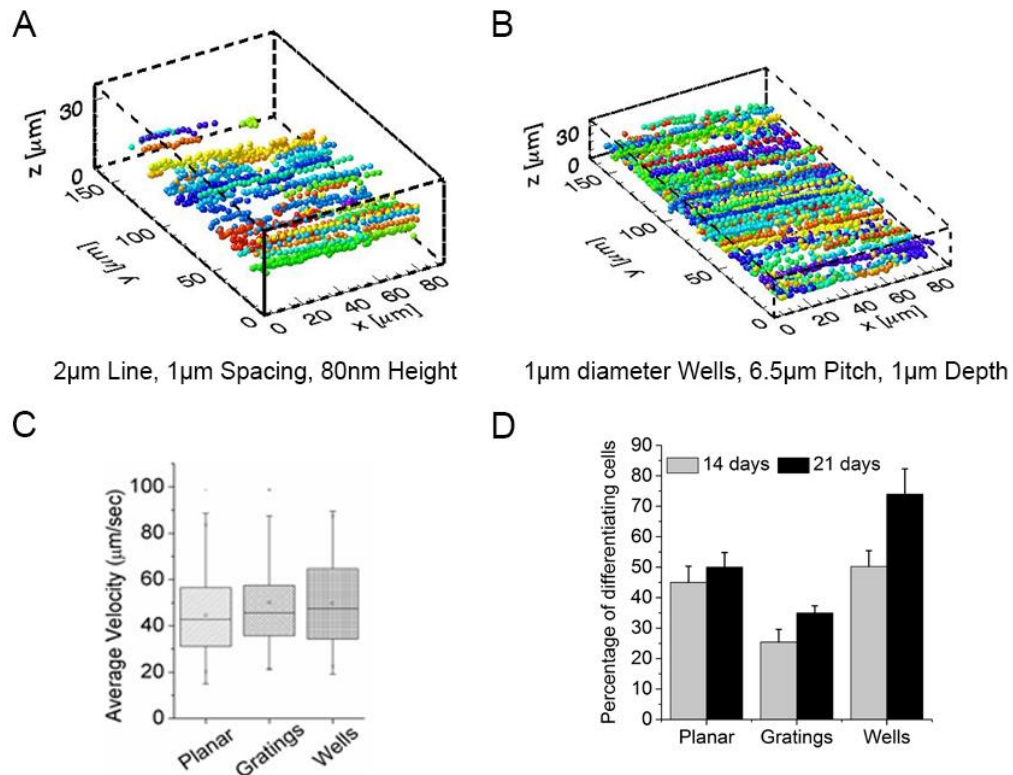

**Supplementary figure S3** | Tracks of bead movement with flowing fluid over topographies seeded with human MSCs. Collective tracks of individual beads (each bead represented by a color) flowing over human MSCs seeded over (A) gratings and (B) wells plotted in a 3D graph. C. Box plot of average velocity of the flowing beads. 50 beads were tracked in 3 independent experiments. The gratings were aligned perpendicular to the flow direction. There is no statistical difference ( $p > 0.05$ ). D. Plot of percentage human MSCs differentiating on planar substrates, gratings and wells.

**Supplementary figure Table S1.** List of primer sequences used for qPCR

| Gene         | Forward Primer Sequence | Reverse Primer Sequence |
|--------------|-------------------------|-------------------------|
| <i>GAPDH</i> | CTTTGTCAAGCTCATTTCCTGG  | TCTTCCTCTTGTGCTCTTGC    |
| <i>MYH2</i>  | CAGACCAAAGAACAGGCAGA    | TCGCATCAATAAAGCTCTGG    |
| <i>RHOA</i>  | GGGAGCTAGCCAAGATGAAG    | TGGAGTGTTCAAGCAAGACC    |
| <i>ALPL</i>  | GATGTGGAGTATGAGAGTGACG  | GGTCAAGGGTCAGGAGTTC     |
| <i>RUNX2</i> | TTCACCTTGACCATAACCGTC   | GGCGGTCAGAGAACAACACTAG  |
| <i>SPPI</i>  | AGGCTGATTCTGGAAGTTCTG   | CTTACTTGGAAGGGTCTGTGG   |
| <i>BGLAP</i> | TGACGAGTTGGCTGACCA      | AGGGTGCCTGGAGAGGAG      |
| <i>CD44</i>  | ACCCAAATCATTCTGAAGGC    | ACCTTCATCCCAGTGACCTC    |

|             |                      |                      |
|-------------|----------------------|----------------------|
| <i>THY1</i> | CCTAGTGGACCAGAGCCTTC | CAGTTCACCCATCCAGTACG |
| <i>ENG</i>  | CTCTCTGGGCCTTGAGTTTC | ACCGTCTCTGGGTTCAAATC |
